# Supplementary material
Source: PubMed Central journal article supplement (PMC4282561)

# Supplementary Figure S4

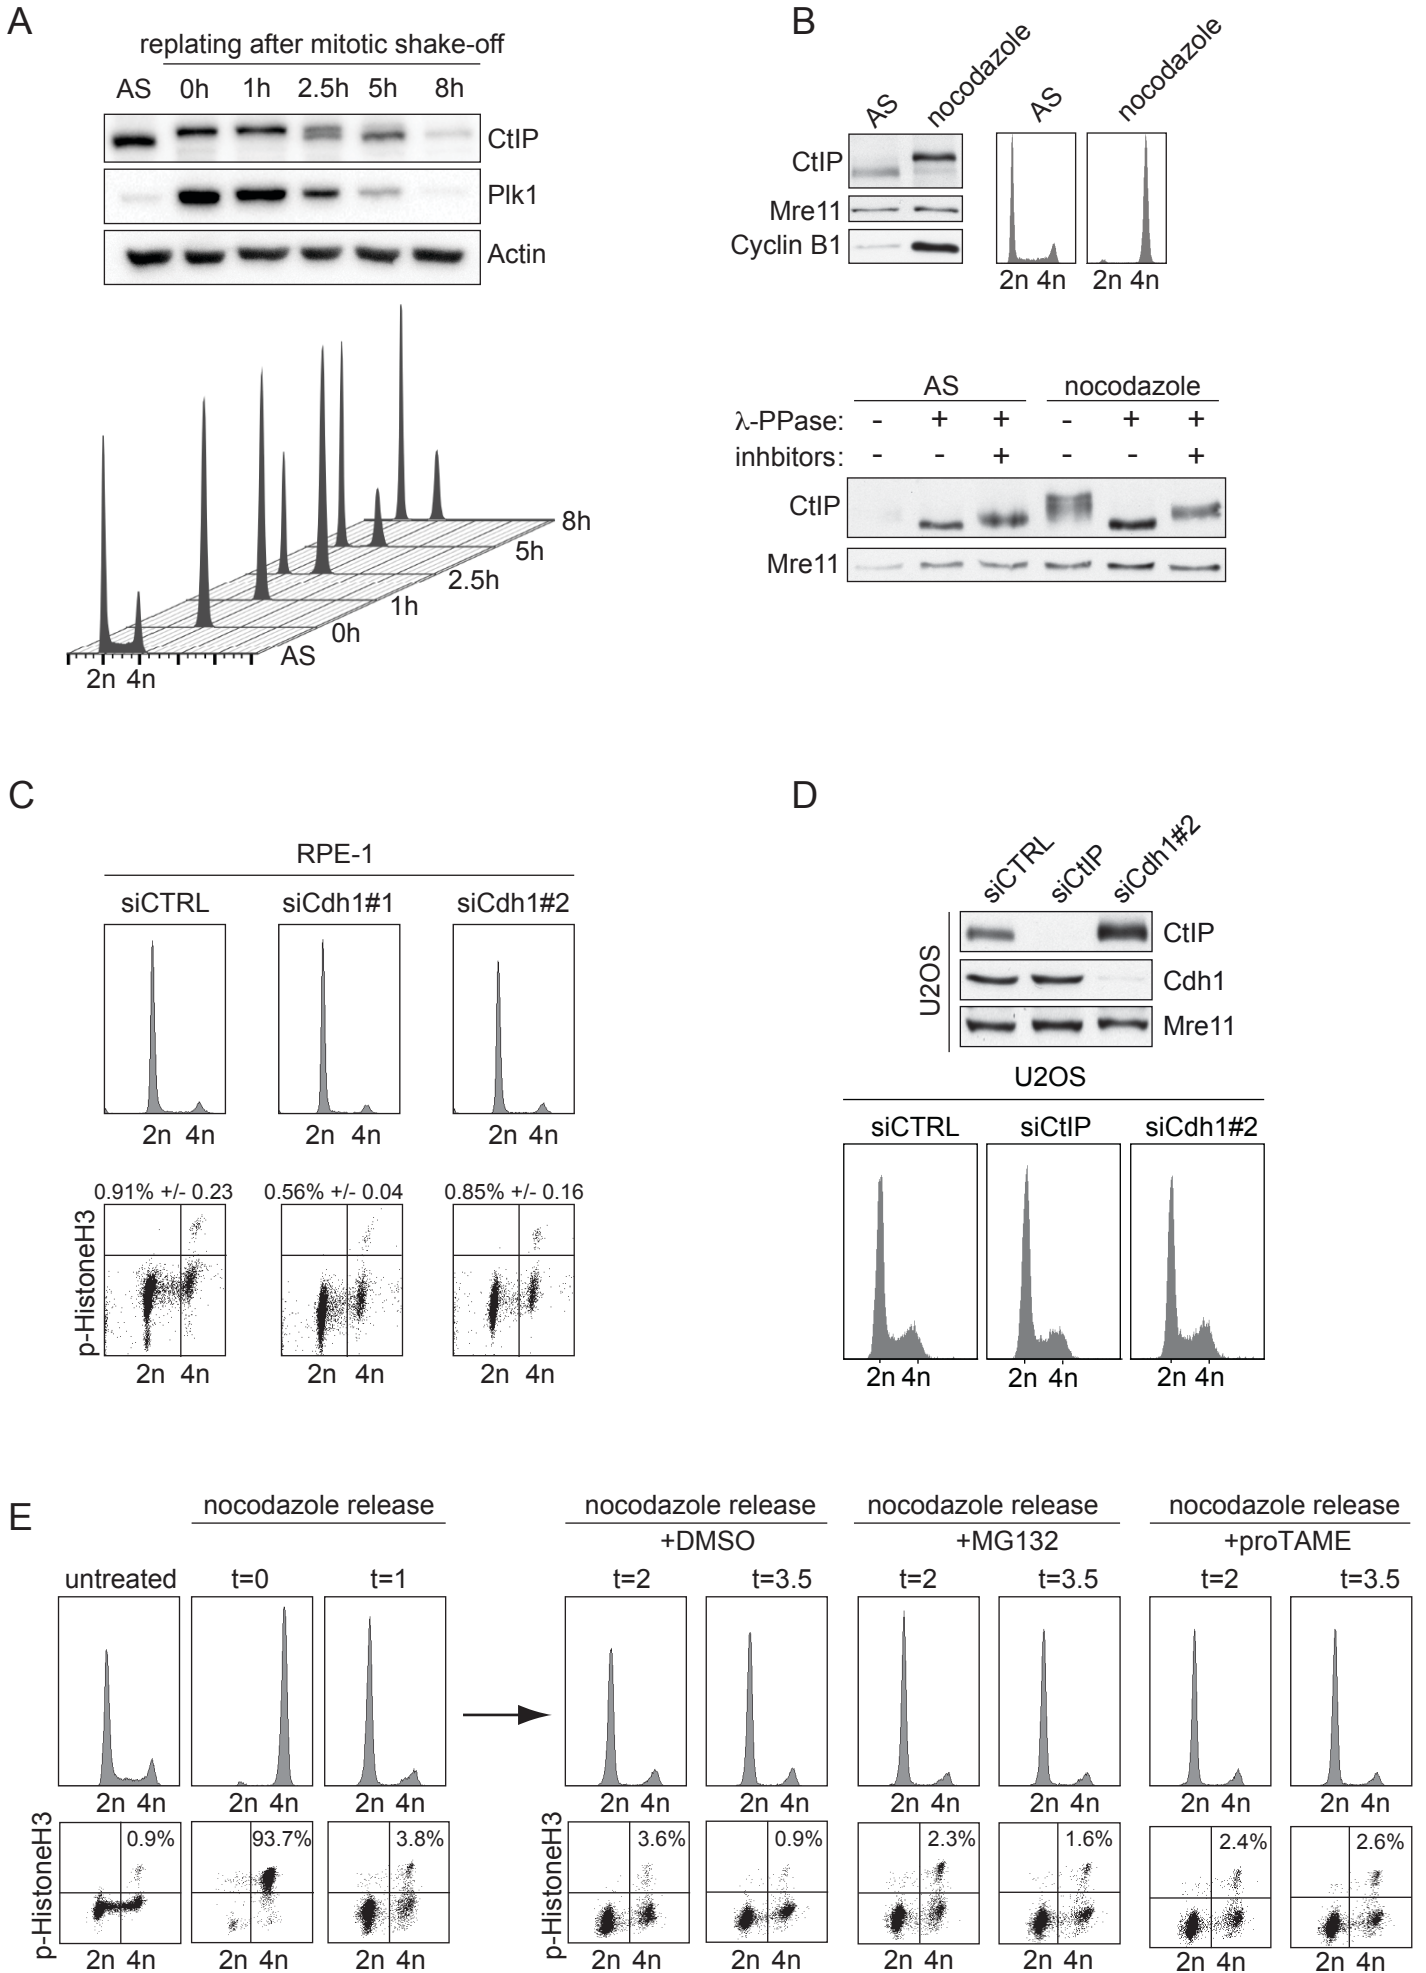

Supplement: embj0033-2860-sd4.pdf [file embj0033-2860-sd4.pdf]
